# Supplementary material
Source: Preprints.org preprint supplement (doi:10.20944/preprints202105.0703.v1)
Supplement: Supplementary file 1 [file Supplementary Material 1.docx]

**Supplementary material 1**

**AML-related NPM mutations drive p53 delocalization into the cytoplasm with possible impact on p53-dependent stress response**

*Holoubek A.1, Strachotová D. 2, Otevřelová P. 1, Röselová P. 1, Heřman P. 2 and Brodská B. 1*

1Department of Proteomics, Institute of Hematology and Blood Transfusion, U Nemocnice 1, 128 20 Prague, Czech Republic

2Faculty of Mathematics and Physics, Institute of Physics, Charles University, Ke Karlovu 5, 121 16 Prague 2, Czech Republic


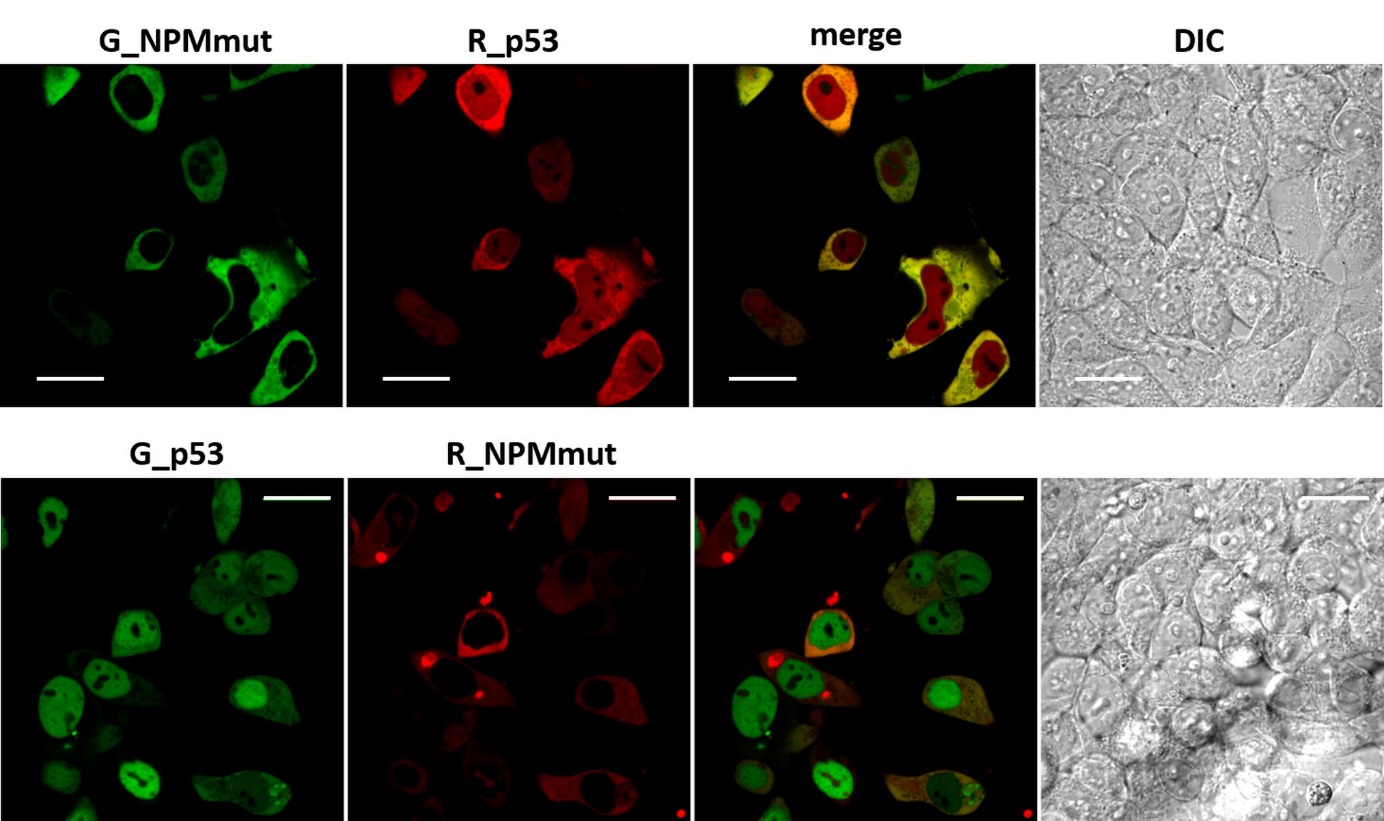


**Figure S1**. Localization of p53 co-expressed with NPMmut in HEK-293T cells shown for two tagging combinations. Upper row - co-expression of G_NPMmut and R_p53, lower row - co-expression of R_NPMmut and G_p53. Columns from left to right represent eGFP fluorescence, mRFP1 fluorescence, merge of both channels, and DIC image. Bar indicates 20 µm.


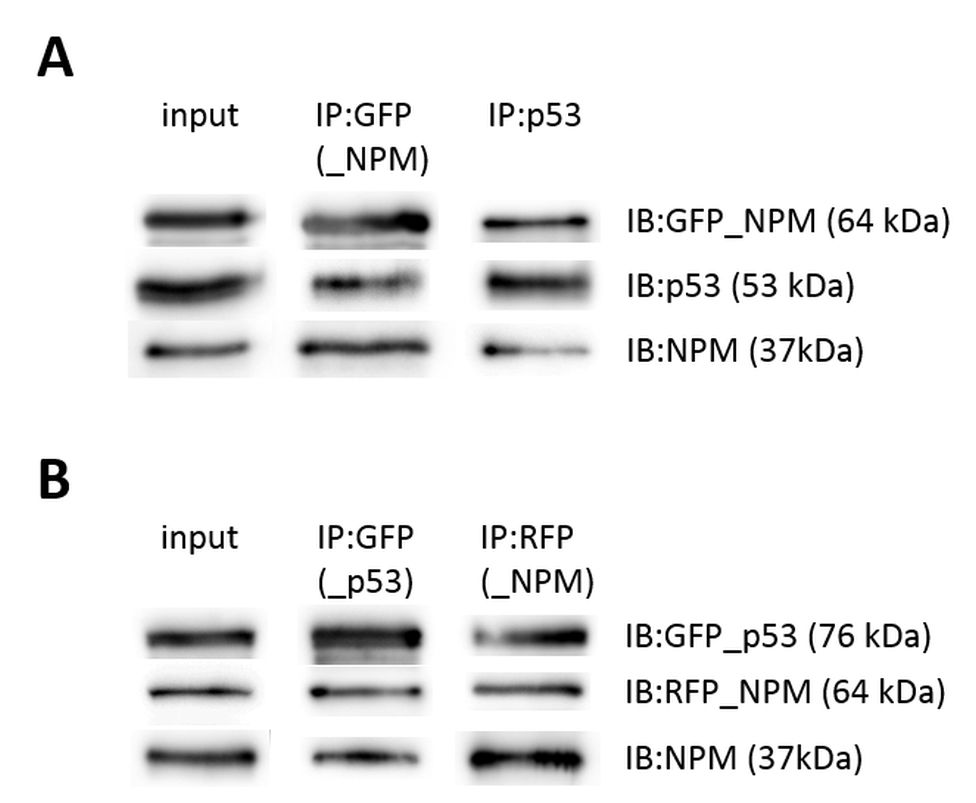


**Figure S2**. Interaction between NPMwt and p53 in cell lysates of transfected HEK-293T cells. (**A**)Transfection with G_NPMwt; precipitation with GFP Trap and p53-Trap. Endogenous p53 co-precipitates with NPMwt, both exo- and endogenous NPMwt co-precipitate with the p53; (**B**) Co-transfection with G_p53 and R_NPMwt; precipitation with GFP-Trap and RFP-Trap. Exogenous p53 co-precipitates with exogenous NPMwt. Both exo- and endogenous NPMwt co-precipitate with exogenous p53.


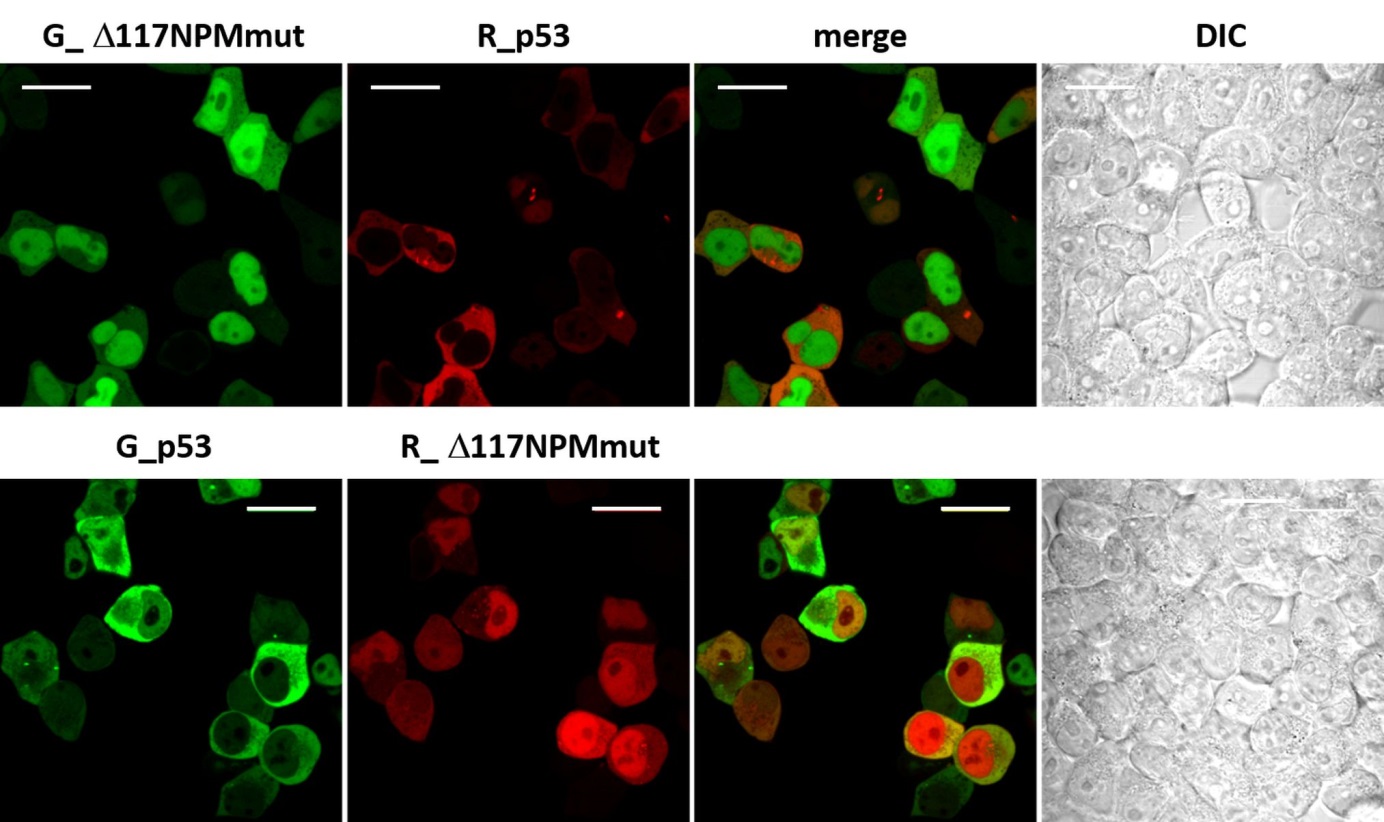


**Figure S3**. Localization of p53 co-expressed with Δ117mut in HEK-293T cells shown for two tagging combinations. Upper row - co-expression of G_Δ117mut with R_p53, lower row - co-expression of R_Δ117mut with G_p53. Columns from left to right represent eGFP fluorescence, mRFP1 fluorescence, merge of both channels, and DIC image. Bar indicates 20 µm.


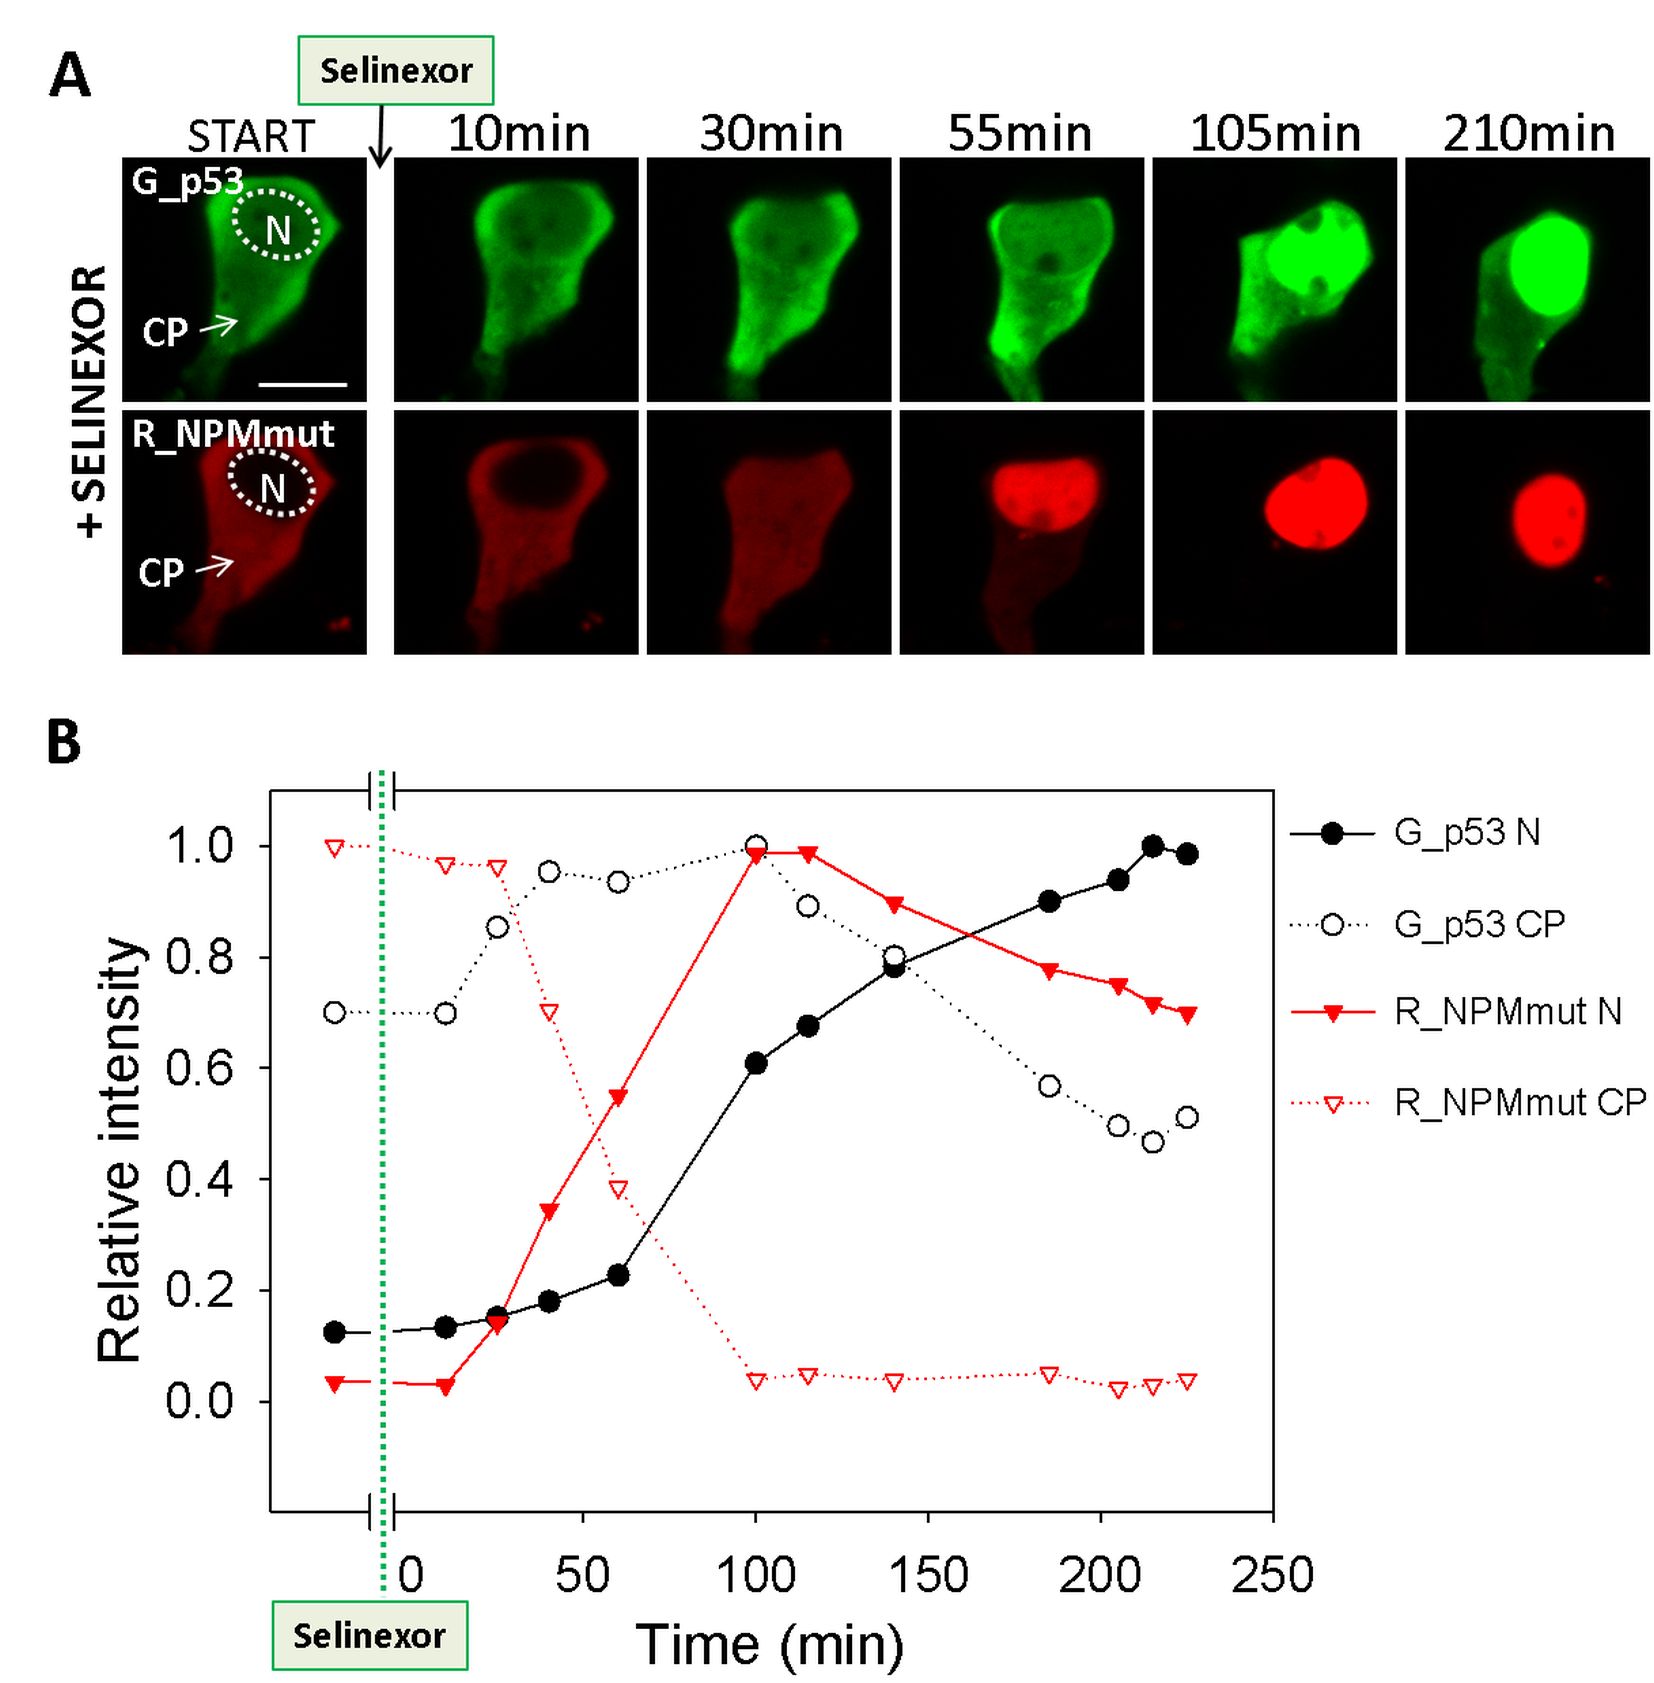


**Figure S4**. Effect of Selinexor on the fluorescence intensity and localization of G_p53 and R_NPMmut co-transfected in HEK-293T cells. (**A**)Intensity images of G_p53 co-expressed with R_NPMmut at different times upon the addition of 4 µM Selinexor. Depicted is the unconverted cell no. 2 from **Figure 7A**. Bar represents 10 µm; (**B**)Fluorescence intensity changes of G_p53 (circles) and R_NPMmut (triangles) in the nucleus (N) and the cytoplasm (CP) of the cell from the panel A. Areas used for integration of the fluorescence signal are separated by the dotted linein panel A. Intracellular G_p53 was not photoconverted.
